# Supplementary material
Source: PubMed Central journal article supplement (PMC6291356)
Supplement: NIHMS1508195-supplement-2.pdf [file NIHMS1508195-supplement-2.pdf]

**Supplementary Table 1.** Gene-specific primers used for quantitative real-time PCR analysis.

|                          | Oligonucleotides                   |
|--------------------------|------------------------------------|
| FW <i>Abca1</i>          | 5'-GGTTTGGAGATGGTTATACAATAGTTGT-3' |
| RV <i>Abca1</i>          | 5'-CCCGGAAACGCAAGTCC-3'            |
| FW <i>Axl</i>            | 5'-ATGGCCGACATTGCCAGTG-3'          |
| RV <i>Axl</i>            | 5'-CGGTAGTAATCCCCGTTGTAGA-3'       |
| FW <i>Cd36</i>           | 5'-ATGGGCTGTGATCGGAACTG-3'         |
| RV <i>Cd36</i>           | 5'-GTCTTCCCAATAAGCATGTCTCC-3'      |
| FW <i>Chemr23</i>        | 5'-ATGGAGTACGACGCTTACAACG-3'       |
| RV <i>Chemr23</i>        | 5'-GGTGGCGATGACAATCACCA-3'         |
| FW <i>Del1</i> *         | 5'-CCTGTGAGATAAGCGAAGC-3'          |
| RV <i>Del1</i> *         | 5'-GAGCTCGGTGAGTAGATG-3'           |
| FW <i>Del1-[E1-E3]**</i> | 5'-TTTGGTTGGACTCAGCCTCG-3'         |
| RV <i>Del1-[E1-E3]**</i> | 5'-AGCCAGTCCTGACAGACAGA-3'         |
| FW <i>Fpr2</i>           | 5'-GAGCCTGGCTAGGAAGGTG-3'          |
| RV <i>Fpr2</i>           | 5'-TGCTGAAACCAATAAGGAACCTG-3'      |
| FW <i>Gata6</i>          | 5'-CATCACCATCACCCGACCTAC-3'        |
| RV <i>Gata6</i>          | 5'-GGCCCTGTAAGCTGTGGAG-3'          |
| FW <i>Gpr18</i>          | 5'-CACCTGAGCAATCACAACCA-3'         |
| RV <i>Gpr18</i>          | 5'-AGTGACATTAACAAACAGCCCA-3'       |
| FW <i>Lxra</i>           | 5'-CTCAATGCCTGATGTTTCTCCT-3'       |
| RV <i>Lxra</i>           | 5'-TCCAACCCTATCCCTAAAGCAA-3'       |
| FW <i>Lxrb</i>           | 5'-ATGTCTTCCCCACAAGTTCT-3'         |
| RV <i>Lxrb</i>           | 5'-GACCACGATGTAGGCAGAGC-3'         |
| FW <i>Rxra</i>           | 5'-ATGGACACCAAACATTTCTGC-3'        |
| RV <i>Rxra</i>           | 5'-CCAGTGGAGAGCCGATTCC-3'          |
| FW <i>Tgfb1</i>          | 5'-CTCCCGTGGCTTCTAGTGC-3'          |
| RV <i>Tgfb1</i>          | 5'-GCCTTAGTTTGGACAGGATCTG-3'       |
| FW <i>Tgm2</i>           | 5'-GACAATGTGGAGGAGGGATCT-3'        |
| RV <i>Tgm2</i>           | 5'-CTCTAGGCTGAGACGGTACAG-3'        |
| FW <i>Ucp2</i>           | 5'-ATGGTTGGTTTCAAGGCCACA-3'        |
| RV <i>Ucp2</i>           | 5'-CGGTATCCAGAGGGAAAGTGAT-3'       |
| FW <i>18s</i>            | 5'-GTTCCGACCATAAACGATGCC-3'        |
| RV <i>18s</i>            | 5'-TGGTGGTGCCCTTCCGTCAAT-3'        |
|                          | * full length                      |
|                          | ** EGF domains (E1-E3)             |
